# Supplementary material
Source: PubMed Central journal article supplement (PMC3526967)
Supplement: cn300093g_si_001.pdf [file cn300093g_si_001.pdf]

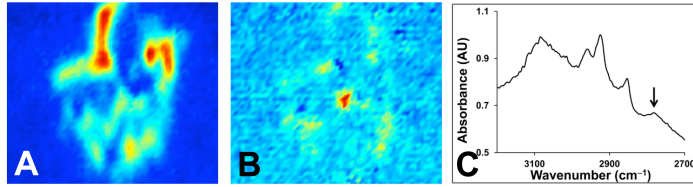

Supplementary Figure 1: Evidence for the existence of creatine zwitterion or HCl salt. FTIR functional group image of creatine deposit using (A) the  $\nu_s(\text{COO}^-)$  band centered at  $1402\text{ cm}^{-1}$ , and (B) the band centered at  $2780\text{ cm}^{-1}$  (assigned to a molecular vibration of the  $\text{NH}_3^+$  group or the HCl salt). (C) A representative spectrum from the creatine deposit, highlighting the band centered at  $2780\text{ cm}^{-1}$  (arrow).

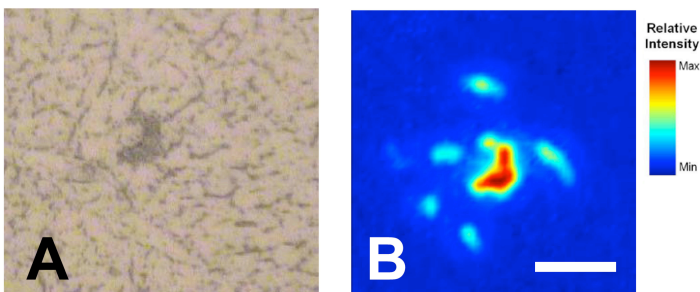

Supplementary Figure 2: (A) Optical image of a creatine micro-deposit on a thin section of tissue mounted on a  $\text{Si}_3\text{N}_4$  window. (B) FTIR functional group image of creatine micro-deposit (second-derivative intensity at  $1402\text{ cm}^{-1}$ ) collected in transmission mode. Scale Bar =  $50\text{ }\mu\text{m}$ .
